# Supplementary material
Source: publisher site journal article supplement (http://www.kjim.org/upload/media/kjim-2023-086-Supplementary-Fig-1.pdf)
Supplement: Supplementary file 1 [file kjim-2023-086-Supplementary-Fig-1.pdf]

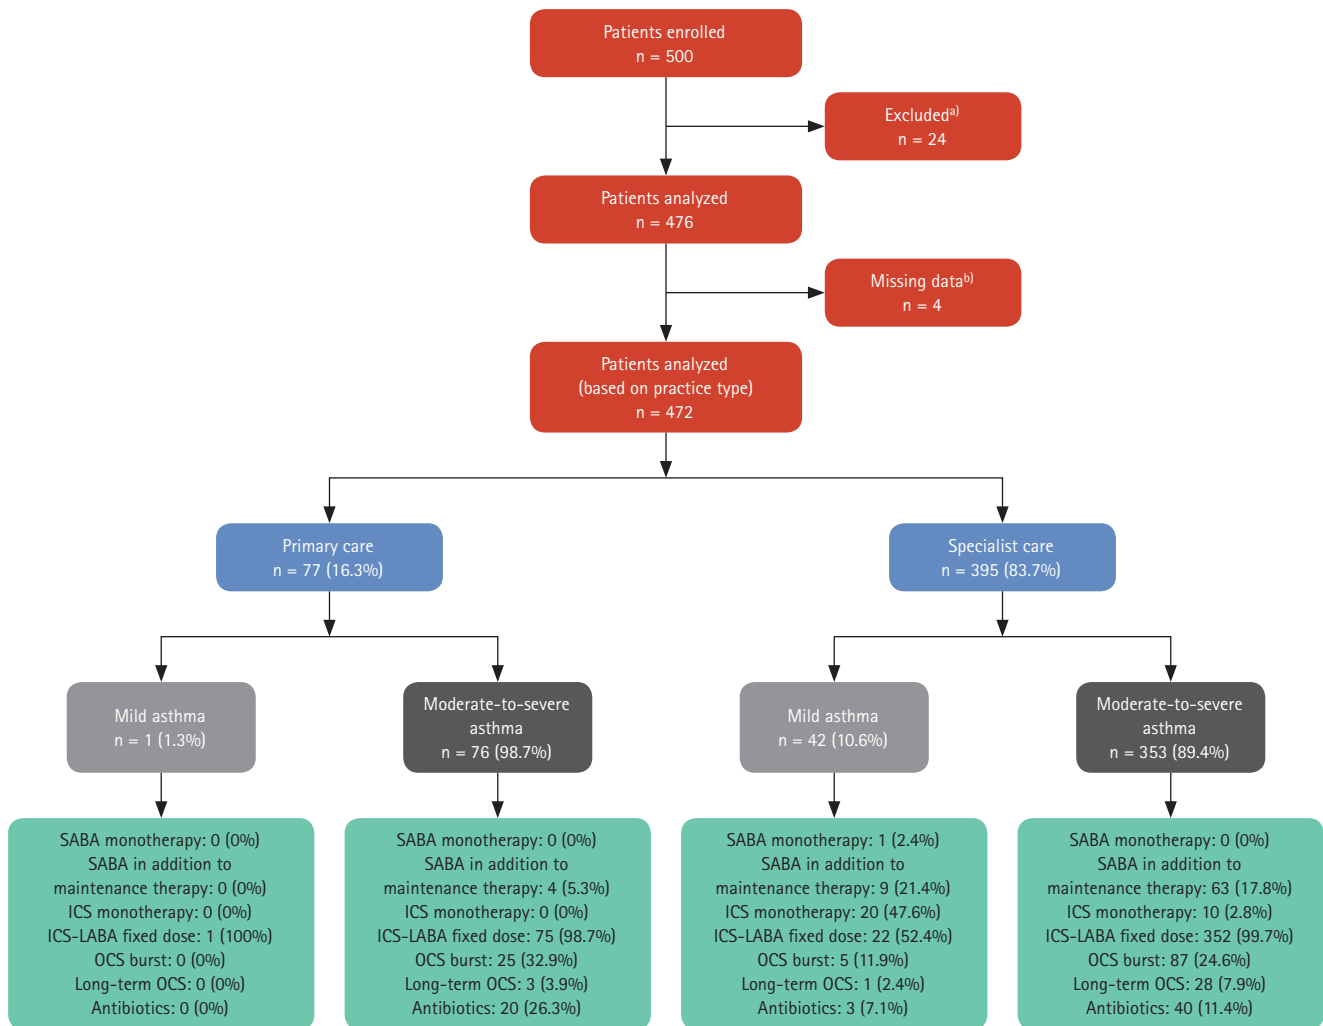

**Supplementary Figure 1.** Patient population and asthma treatments by practice type and asthma severity. Patients could have been prescribed multiple treatments in the past 12 months. ICS, inhaled corticosteroid; LABA, long-acting  $\beta_2$ -agonist; OCS, oral corticosteroid; SABA, short-acting  $\beta_2$ -agonist. <sup>a)</sup>Patients with a history of asthma < 12 months. <sup>b)</sup>Patients with data missing on practice type.
